# Supplementary material
Source: publisher figshare collection journal article supplement (https://geolsoc.figshare.com/ndownloader/files/23204888)
Supplement: Supplementary file 1 [file 23204888]

## Sheet: Table S1
Table S1. Crystal sizes and aspect ratios from 197 zircon grains for K-bentonites in Ordovician-Silurian transition across in nine sections in South China
Section	Min size (μm)	Max size (μm)	Mean size (μm)	Standard deviation (2σ)	Min aspect ratio (AR)	Max aspect ratio (AR)	Mean AR	Standard deviation (2σ)	Number (n)	Reference
Songmutang	83.89	276.89	133.82	28.93	1.04	3.53	1.99	0.56	78	This study
Mayangzhai	109.8	172.93	143.55	17.14	1.44	2.57	2.06	0.35	19	Luo et al. (2016)
Taoyuan	102.84	250.39	166.98	49.83	1.64	4.38	2.57	0.85	12	Xie et al. (2012)
Lunshan	77.08	132.85	95.1	14.92	1.26	3.14	1.94	0.45	24	Yang et al. (2019)
Anji	86.2	152.71	126.88	17.49	1.09	2.38	1.77	0.35	15	Wang et al. (2015)
Xinwen	97.67	142.87	115.58	12.31	1.73	3.13	2.28	0.38	19	Ge et al. (2019)
Wuxing	143.28	220.06	178.02	27.94	2.07	3.81	2.7	0.54	8
Liangba	82.13	110.59	94.76	13.26	1.6	2.28	2.05	0.3	4
Wanjiawan	75.95	173.1	124.88	28.23	1.2	3.4	2.16	0.68	18	Hu et al. (2008)
